# Supplementary material for: Temperature and concentration dependence of the ionic charge transfer between solid and liquid Li+ electrolytes – the systems LLZO:Ta/LiPF6–EC–DMC, LATP/LiPF6–EC–DMC and LLZO:Ta/LiBOB–DME–THF
Source: Royal Society of Chemistry journal article supplement (doi:10.1039/d4cp04738a), 2025-01-01

# Supplemental Material

# S1: Temperature dependent measurement of the (areal) polarisation resistance $R_p$ , LLZO:Ta | EC/DMC + LiPF<sub>6</sub>

**Polarisation  
resistance of  
all measured  
systems**

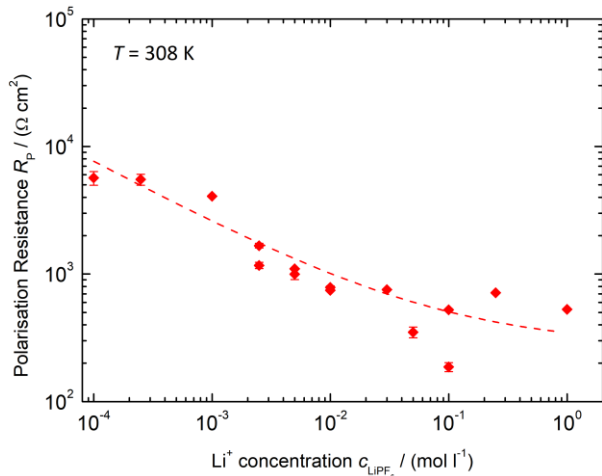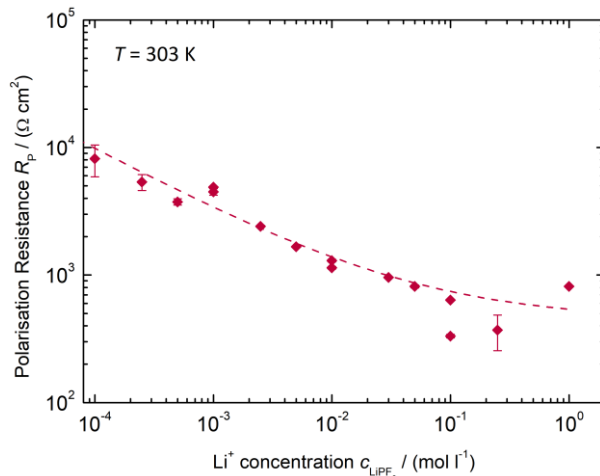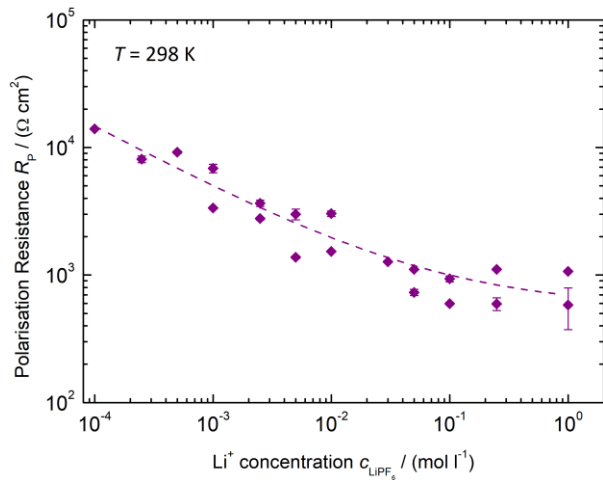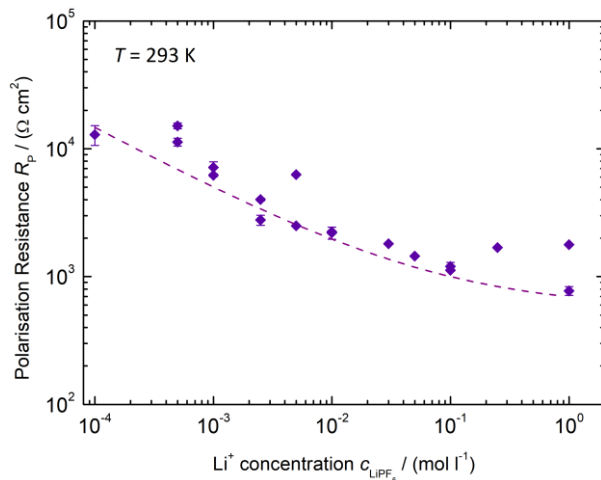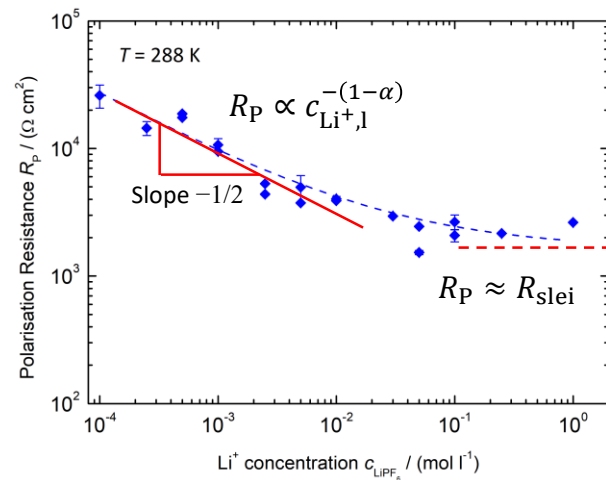

## S2: Temperature dependent measurement of the (areal) polarisation resistance $R_p$ , LLZO:Ta | DME/THF + LiBOB

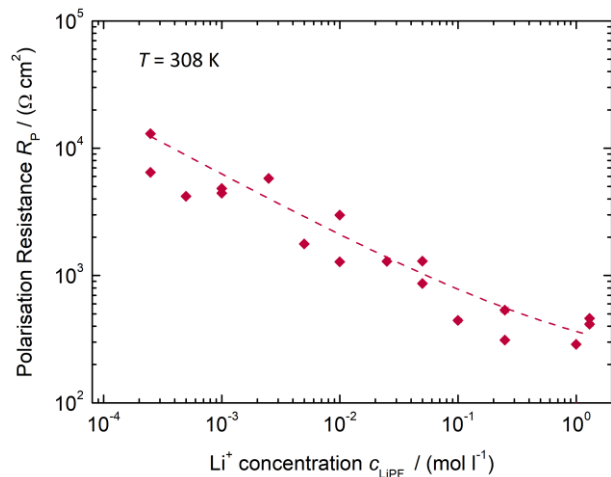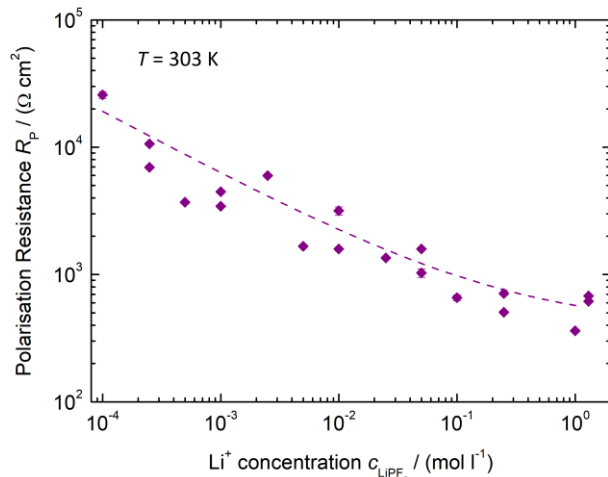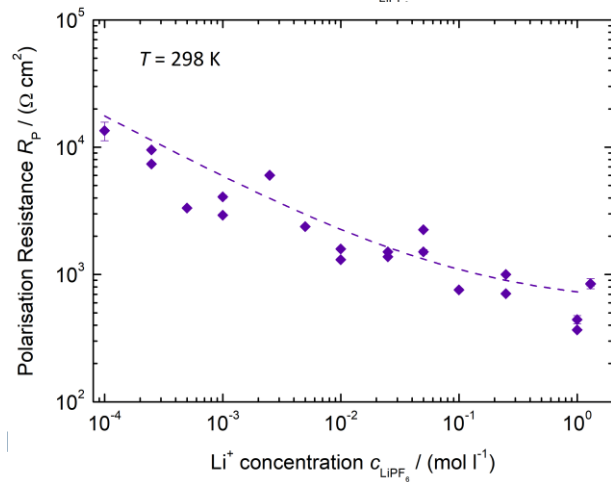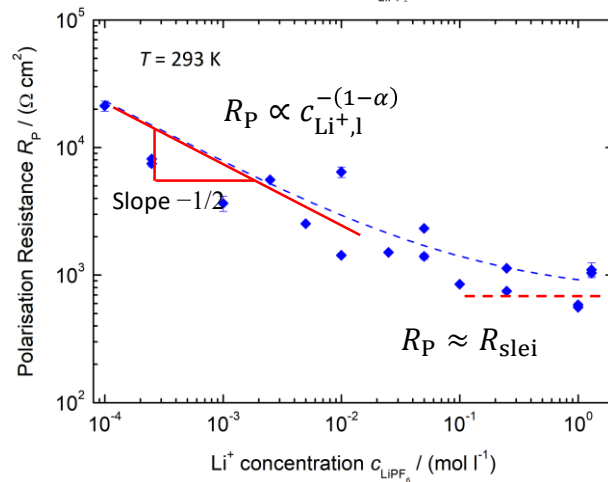

**Polarisation  
resistance of  
all measured  
systems**

### S3: Temperature dependent measurement of the (areal) polarisation resistance $R_p$ , LATP | EC/DMC + LiPF<sub>6</sub>

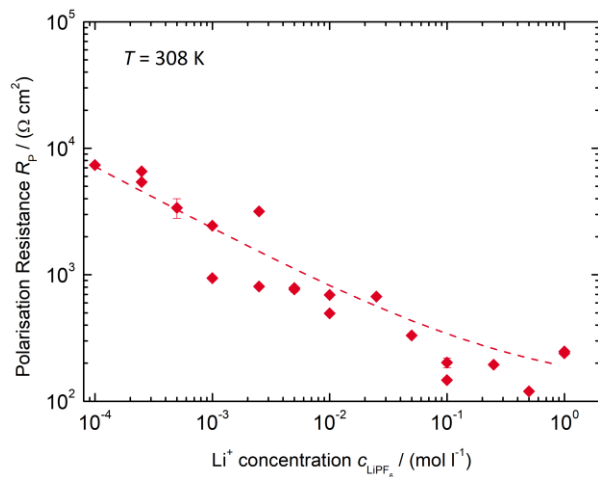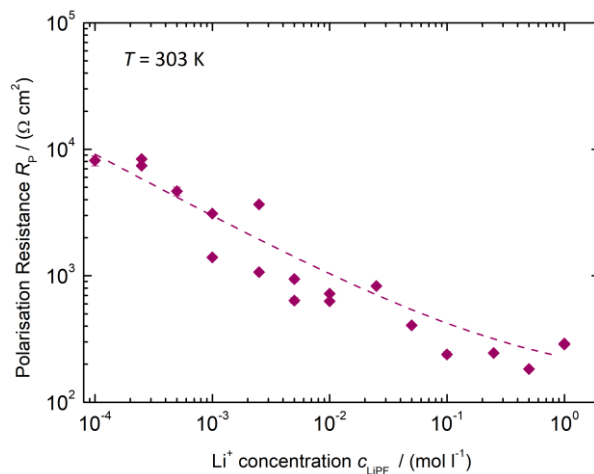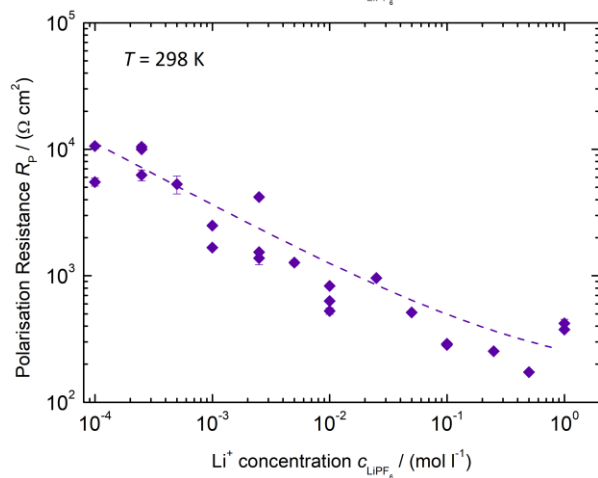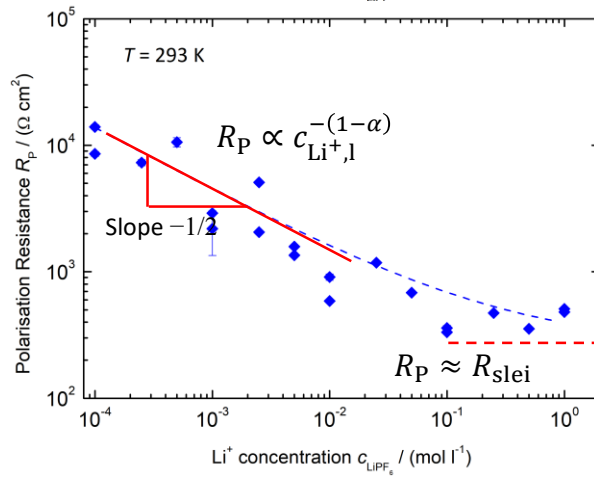

**Polarisation  
resistance of  
all measured  
systems**

**S4:** Values for the areal resistance of the LE|SE interface layer  $R_{\text{slei}}$  and the Butler-Volmer-like rate constant  $k_{\text{ct}}^{0'}$  at different temperatures  $T$ , obtained by fitting of the polarisation resistance  $R_p$  vs.  $\text{Li}^+$  concentration curves in Fig. S1 of the system LLZO:Ta | EC/DMC +  $\text{LiPF}_6$

| Temperature $T$ / K | $R_{\text{slei}} / (\Omega \text{ cm}^2)$ | $k_{\text{ct}}^{0'} \cdot 10^{-9} / (\text{l}^{1/2} \text{ mol}^{1/2} \text{ s}^{-1} \text{ cm}^{-2})$ |
|---------------------|-------------------------------------------|--------------------------------------------------------------------------------------------------------|
| 288                 | $1618 \pm 215$                            | $1.06 \pm 0.11$                                                                                        |
| 293                 | $1060 \pm 205$                            | $1.34 \pm 0.20$                                                                                        |
| 298                 | $559 \pm 109$                             | $1.85 \pm 0.22$                                                                                        |
| 303                 | $443 \pm 104$                             | $3.13 \pm 0.46$                                                                                        |
| 308                 | $284 \pm 88$                              | $3.84 \pm 0.74$                                                                                        |

$$\frac{T}{R_{\text{slei}}} = \frac{1}{(R_{\text{slei}})^*} \exp\left(-\frac{E_{\text{a,slei}}}{RT}\right)$$

| $E_{\text{a,slei}} / (\text{kJ mol}^{-1})$ | $(R_{\text{slei}})^* \cdot 10^{-12} / \Omega$ |
|--------------------------------------------|-----------------------------------------------|
| <b><math>67 \pm 4</math></b>               | $4.34 \pm 7.79$                               |

$$k_{\text{ct}}^{0'} = (k_{\text{ct}}^{0'})^* \exp\left(-\frac{E_{\text{a,ct}}}{RT}\right)$$

| $E_{\text{a,ct}} / (\text{kJ mol}^{-1})$ | $(k_{\text{ct}}^{0'})^* / (\text{l}^{1/2} \text{ mol}^{1/2} \text{ s}^{-1} \text{ cm}^{-2})$ |
|------------------------------------------|----------------------------------------------------------------------------------------------|
| <b><math>51 \pm 4</math></b>             | $1.46 \pm 2.59$                                                                              |

**S5:** Values for the areal resistance of the LE|SE interface layer  $R_{\text{slei}}$  and the Butler-Volmer-like rate constant  $k_{\text{ct}}^{0'}$  at different temperatures  $T$ , obtained by fitting of the polarisation resistance  $R_p$  vs.  $\text{Li}^+$  concentration curves in Fig. **S2** of the system LLZO:Ta | DME/THF + LiBOB

| Temperature $T$ / K | $R_{\text{slei}} / (\Omega \text{ cm}^2)$ | $k_{\text{ct}}^{0'} \cdot 10^{-9} / (\text{l}^{1/2} \text{ mol}^{1/2} \text{ s}^{-1} \text{ cm}^{-2})$ |
|---------------------|-------------------------------------------|--------------------------------------------------------------------------------------------------------|
| 293                 | $695 \pm 190$                             | $1.26 \pm 0.22$                                                                                        |
| 298                 | $560 \pm 121$                             | $1.56 \pm 0.20$                                                                                        |
| 303                 | $384 \pm 102$                             | $1.44 \pm 0.18$                                                                                        |
| 308                 | $172 \pm 72$                              | $1.43 \pm 0.19$                                                                                        |

$$\frac{T}{R_{\text{slei}}} = \frac{1}{(R_{\text{slei}})^*} \exp\left(-\frac{E_{\text{a,slei}}}{RT}\right)$$

| $E_{\text{a,slei}} / (\text{kJ mol}^{-1})$ | $(R_{\text{slei}})^* \cdot 10^{-13} / \Omega$ |
|--------------------------------------------|-----------------------------------------------|
| <b>71 ± 15</b>                             | $6.4 \pm 38.3$                                |

$$k_{\text{ct}}^{0'} = (k_{\text{ct}}^{0'})^* \exp\left(-\frac{E_{\text{a,ct}}}{RT}\right)$$

| $E_{\text{a,ct}} / (\text{kJ mol}^{-1})$ | $(k_{\text{ct}}^{0'})^* \cdot 10^{-8} / (\text{l}^{1/2} \text{ mol}^{1/2} \text{ s}^{-1} \text{ cm}^{-2})$ |
|------------------------------------------|------------------------------------------------------------------------------------------------------------|
| <b>8 ± 9</b>                             | $3.7 \pm 12.7$                                                                                             |

**S6:** Values for the areal resistance of the LE|SE interface layer  $R_{\text{slei}}$  and the Butler-Volmer-like rate constant  $k_{\text{ct}}^{0'}$  at different temperatures  $T$ , obtained by fitting of the polarisation resistance  $R_p$  vs.  $\text{Li}^+$  concentration curves in Fig. **S4** of the system LATP | EC/DMC +  $\text{LiPF}_6$

| Temperature $T$ / K | $R_{\text{slei}}$ / ( $\Omega \text{ cm}^2$ ) | $k_{\text{ct}}^{0'} \cdot 10^{-9}$ / ( $\text{l}^{1/2} \text{ mol}^{1/2} \text{ s}^{-1} \text{ cm}^{-2}$ ) |
|---------------------|-----------------------------------------------|------------------------------------------------------------------------------------------------------------|
| 293                 | $273 \pm 92$                                  | $2.14 \pm 0.31$                                                                                            |
| 298                 | $189 \pm 71$                                  | $2.40 \pm 0.30$                                                                                            |
| 303                 | $125 \pm 53$                                  | $2.82 \pm 0.36$                                                                                            |
| 308                 | $104 \pm 44$                                  | $3.73 \pm 0.51$                                                                                            |

$$\frac{T}{R_{\text{slei}}} = \frac{1}{(R_{\text{slei}})^*} \exp\left(-\frac{E_{\text{a,slei}}}{RT}\right)$$

| $E_{\text{a,slei}}$ / ( $\text{kJ mol}^{-1}$ ) | $(R_{\text{slei}})^* \cdot 10^{-10}$ / $\Omega$ |
|------------------------------------------------|-------------------------------------------------|
| <b><math>52 \pm 5</math></b>                   | $4.22 \pm 7.25$                                 |

$$k_{\text{ct}}^{0'} = (k_{\text{ct}}^{0'})^* \exp\left(-\frac{E_{\text{a,ct}}}{RT}\right)$$

| $E_{\text{a,ct}}$ / ( $\text{kJ mol}^{-1}$ ) | $(k_{\text{ct}}^{0'})^* \cdot 10^{-4}$ / ( $\text{l}^{1/2} \text{ mol}^{1/2} \text{ s}^{-1} \text{ cm}^{-2}$ ) |
|----------------------------------------------|----------------------------------------------------------------------------------------------------------------|
| <b><math>27 \pm 4</math></b>                 | $1.56 \pm 2.69$                                                                                                |

## Li<sup>+</sup> conductivity of SEs

The potential drop  $U_{p4} - U_{p3}$  between the probes p3 and p4 is equal to the electrochemical potential difference in the bulk of the SE. Its change as a function of the polarisation current density  $i$  is proportional to the bulk ionic conductivity  $\sigma_{\text{Li}^+}$ . The results for LLZO:Ta and LATP are depicted in Fig. S4 and S5.

$$\sigma_{\text{Li}^+} = F \frac{i \Delta x}{\Delta \tilde{\mu}_{\text{Li}^+}} = \frac{i d_{p4\dots p3}}{U_{p4} - U_{p3}} \quad d_{p4\dots p3} : \text{Distance between the probes p3 and p4}$$

**S7:** Ionic conductivity  $\sigma_{\text{Li}^+}$  of LLZO:Ta and LATP

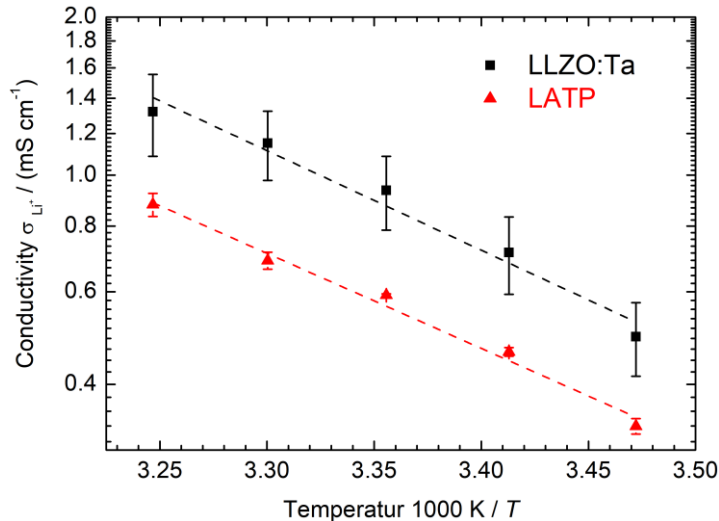

**S8:** Ionic conductivity  $\sigma_{\text{Li}^+}$  of LLZO:Ta and LATP

|         | $E_a$ / (kJ mol <sup>-1</sup> ) |
|---------|---------------------------------|
| LLZO:Ta | 36.3 ± 3.3                      |
| LATP    | 34.7 ± 2.1                      |

$$T\sigma_{\text{Li}^+} = \sigma_{\text{Li}^+}^* \exp\left(-\frac{E_a}{RT}\right)$$



## Comparison to a former study

**S9:** Polarisation resistance  $R_p$  of the system LLZO:Ta | EC/DMC + LiPF<sub>6</sub> at 298 K, data measured in this study (black squares) and data from M. Schleutker, J. Bahner, C.-L. Tsai and C. Korte, Phys. Chem. Chem. Phys., 2017, **19**, 26596–26605 (red diamonds) [19]

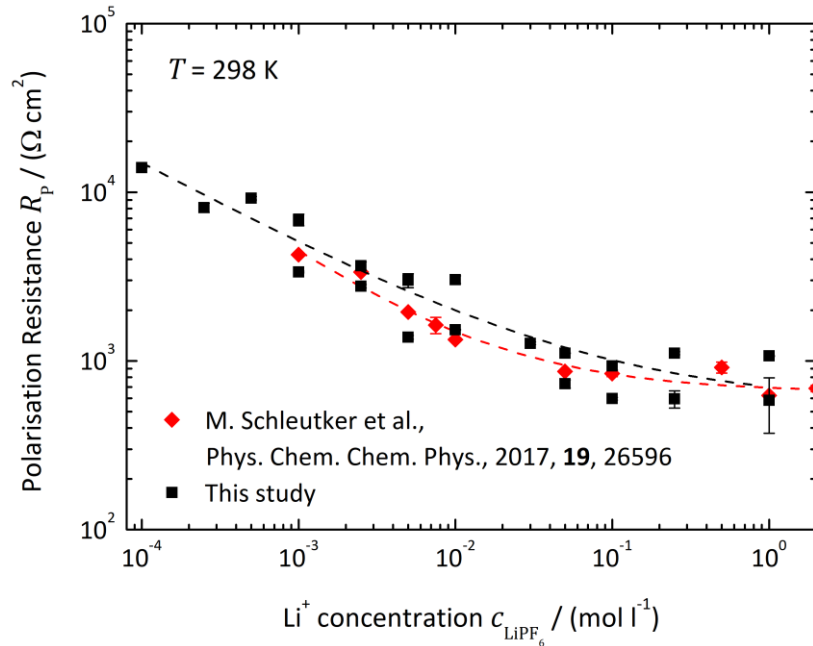

Supplement: d4cp04738a1.pdf [file d4cp04738a1.pdf]
